# Supplementary material for: The “COVID-19 Pandemic Gap” and Its Influence on Oncologic Outcomes of Bladder Cancer
Source: MDPI journal article supplement (doi:10.3390/cancers13081754), 2021-04-07
Supplement: s1 [file s1]

# Supplementary materials: The “COVID-19 Pandemic Gap” and Its Influence on Oncologic Outcomes of Bladder Cancer

Gennadi Tulchiner, Nina Staudacher, Josef Fritz, Christian Radmayr, Zoran Culig, Wolfgang Horninger and Renate Pichler

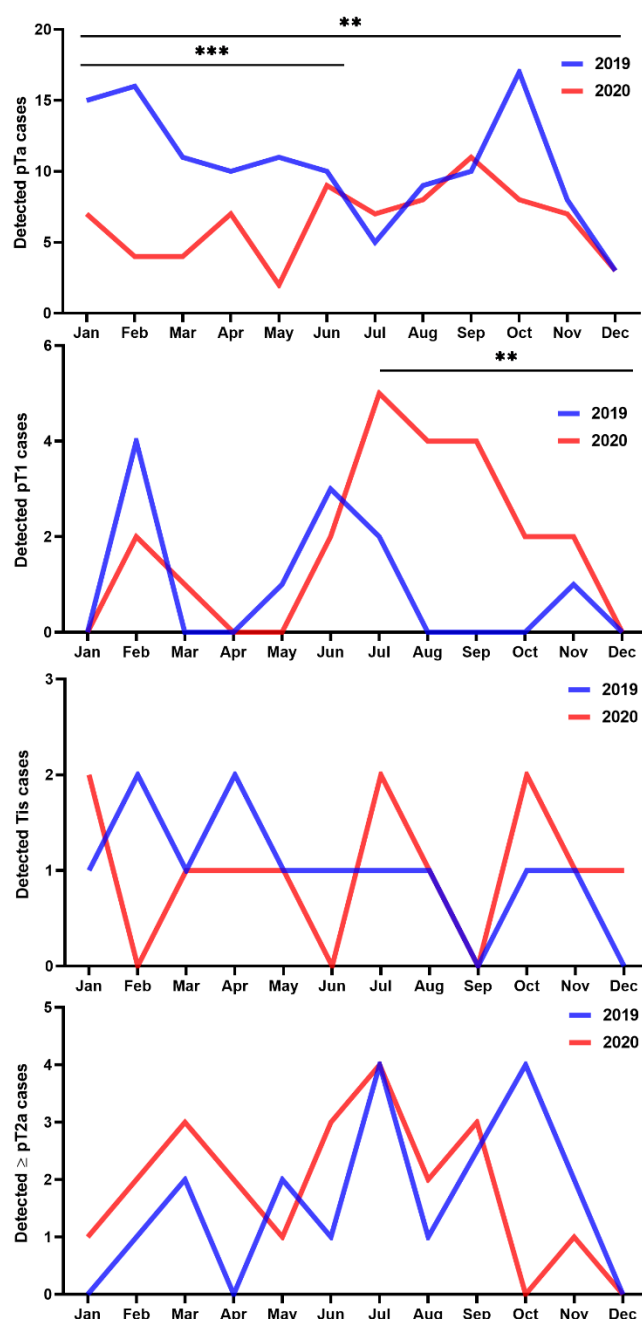

**Figure S1.** Differences of tumor stage between 2019 and 2020 stratified by monthly diagnosis.
